# Supplementary material for: Activation of the methane C–H bond by Al- and Ga-doped graphenes: a DFT investigation
Source: Royal Society of Chemistry journal article supplement (doi:10.1039/d1nj03456a), 2021-01-01

## “Supplementary Materials”

### **Activation of the methane C-H bond by Al- and Ga-doped graphenes: A DFT investigation**

**Parisasadat Mousavian <sup>a</sup>, Mehdi D. Esrafil<sup>\*,b</sup>, Jaber J. Sardroodi <sup>\*,a</sup>**

<sup>a</sup> Department of Chemistry, Azarbaijan Shahid Madani University, Tabriz, Iran

<sup>b</sup> Department of Chemistry, Faculty of Basic Sciences, University of Maragheh, P.O. Box 55136-553, Maragheh, Iran

\* Corresponding author. **E-mails:** [esrafil@maragheh.ac.ir](mailto:esrafil@maragheh.ac.ir) (M. D. Esrafil); [jsardroodi@azaruniv.ac.ir](mailto:jsardroodi@azaruniv.ac.ir) (J. J. Sardroodi).

**Figure S1.** Energy profile and activation barrier for diffusing the (a) Al and (b) Ga atom on graphene

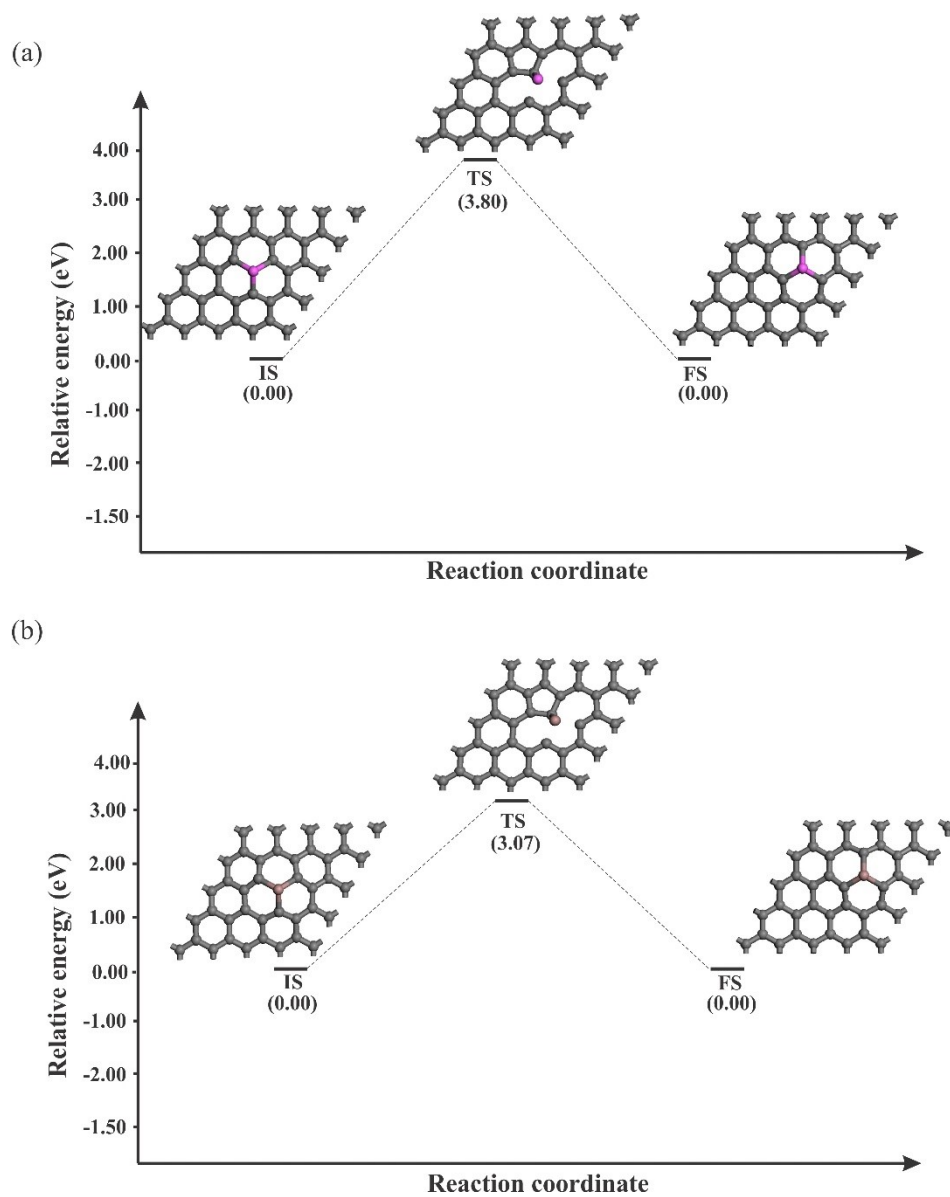

**Figure S2.** The adsorption of CH<sub>4</sub> via the C-H bond on (a) Al-Gr and (b) Ge-Gr

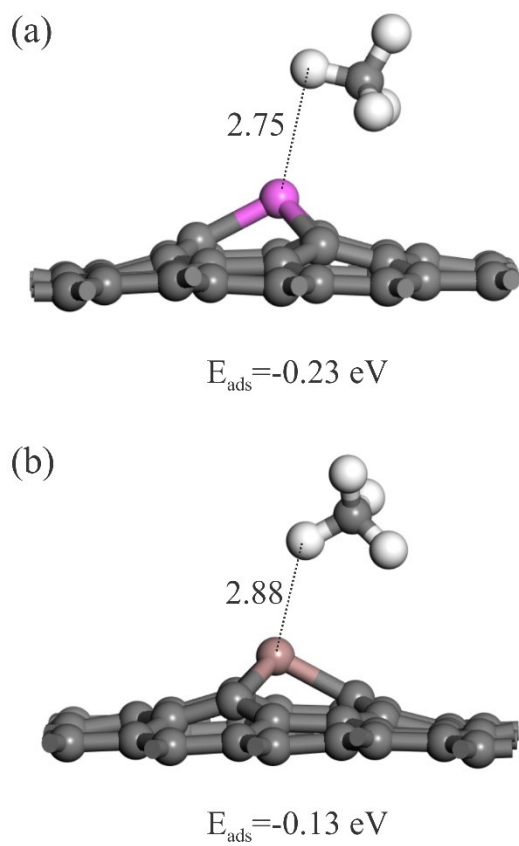

Supplement: d1nj03456a1.pdf [file d1nj03456a1.pdf]
